# Supplementary material for: Directional growth of octacalcium phosphate using micro-flow reactor mixing and subsequent aging
Source: Royal Society of Chemistry journal article supplement (doi:10.1039/d1ra00827g), 2021-01-01
Supplement: d1ra00827g1.pdf [file d1ra00827g1.pdf]

**ELECTRONIC SUPPLEMENTARY INFORMATION**

**DIRECTIONAL GROWTH OF OCTACALCIUM PHOSPHATE USING MICRO-FLOW**

**REACTOR MIXING AND SUBSEQUENT AGING**

Ploypailin (Milin) Saengdet, and Makoto Ogawa\*

School of Energy Science and Engineering, Vidyasirimedhi Institute of Science and Technology (VISTEC), 555 Moo 1 Payupnai, Wangchan, Rayong 21210, Thailand

\*Corresponding author. [Makoto.ogawa@vistec.ac.th](mailto:Makoto.ogawa@vistec.ac.th)

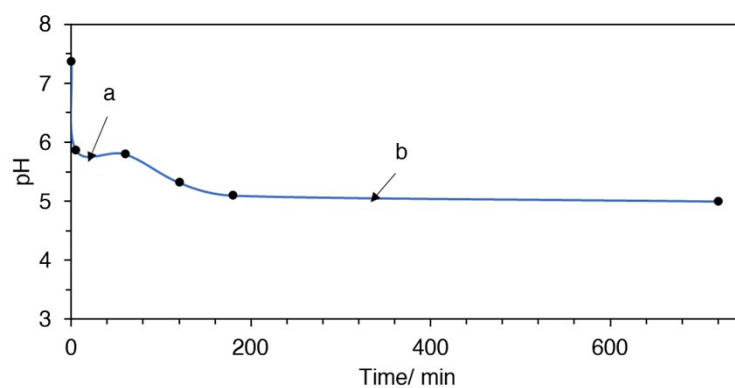

**Figure S1.** Change of pH during the aging at 50°C starting from the solutions with the initial concentration of  $\text{Ca}(\text{CH}_3\text{COO})_2 \cdot \text{H}_2\text{O}$  and  $\text{NaH}_2\text{PO}_4$  0.04 M

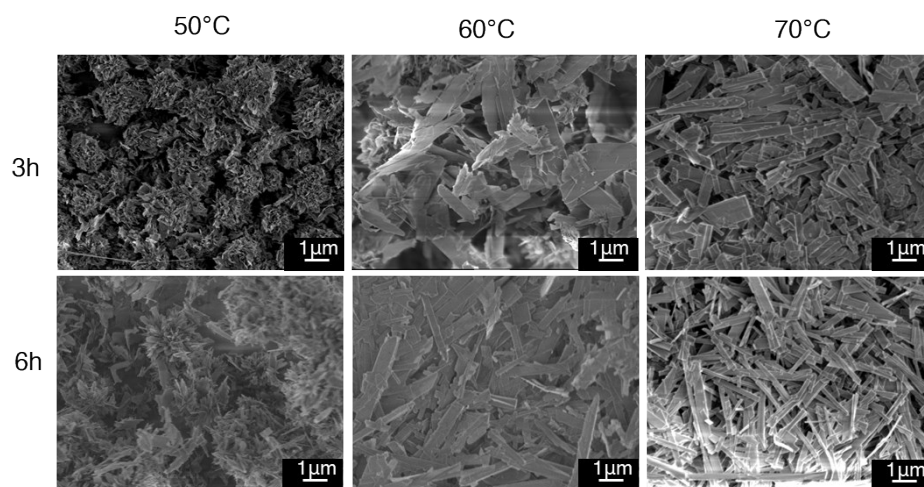

**Figure S2** SEM images of the samples from batch preparation at different temperatures and aging times using the calcium acetate solution and sodium phosphate (0.04 M) monobasic solution (0.03M), respectively.

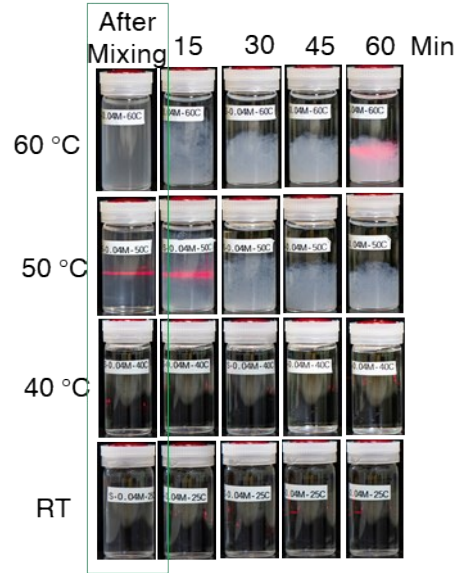

**Figure S3** the photographs of the suspension obtained after the mixing and subsequent aging at the designated temperatures at starting calcium concentration of 0.04M and phosphate solution of 0.03M

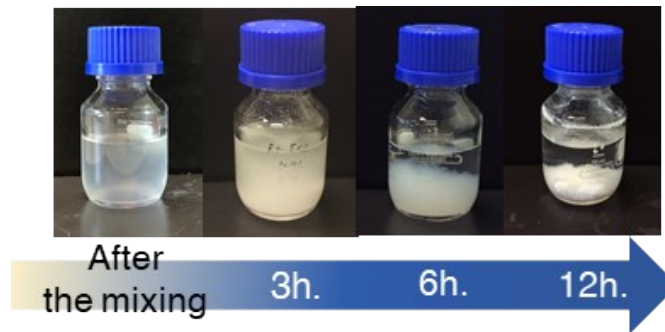

**Figure S4** the appearances of the suspension at different aging times.

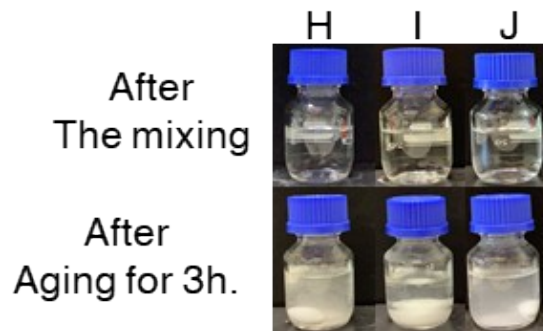

**Figure S5** the photographs of the suspension obtained after the mixing and subsequent aging for 3 h at the designated temperatures.
